# Supplementary material
Source: PubMed Central journal article supplement (PMC5606349)
Supplement: INC653770_supplementary_material.pdf [file INC653770_supplementary_material.pdf]

| <b>Appendix 1.</b>                                              |
|-----------------------------------------------------------------|
| Airedale NHS Foundation Trust                                   |
| Ashford and St Peter's Hospitals NHS Foundation Trust           |
| Barking, Havering and Redbridge University Hospitals NHS Trust  |
| Barnet and Chase Farm Hospitals NHS Trust                       |
| Barts and The London NHS Trust                                  |
| Basildon and Thurrock University Hospitals NHS Foundation Trust |
| Birmingham Women's NHS Foundation Trust                         |
| Blackpool Teaching Hospitals NHS Foundation Trust               |
| Bolton NHS Foundation Trust                                     |
| Buckinghamshire Healthcare NHS Trust                            |
| Burton Hospitals NHS Foundation Trust                           |
| Calderdale and Huddersfield NHS Foundation Trust                |
| Cambridge University Hospitals NHS Foundation Trust             |
| Cambridgeshire Community Services NHS Trust                     |
| Central Manchester University Hospitals NHS Foundation Trust    |
| Chelsea and Westminster Hospital NHS Foundation Trust           |
| Chesterfield Royal Hospital NHS Foundation Trust                |
| City Hospitals Sunderland NHS Foundation Trust                  |
| Colchester Hospital University NHS Foundation Trust             |
| Countess of Chester Hospital NHS Foundation Trust               |
| County Durham and Darlington NHS Foundation Trust               |
| Croydon Health Services NHS Trust                               |
| Darlington PCT                                                  |
| Dartford and Gravesham NHS Trust                                |
| Doncaster and Bassetlaw Hospitals NHS Foundation Trust          |
| Dorset County Hospital NHS Foundation Trust                     |
| Ealing Hospital NHS Trust                                       |
| East and North Hertfordshire NHS Trust                          |
| East Cheshire NHS Trust                                         |
| East Kent Hospitals University NHS Foundation Trust             |
| East Lancashire Hospitals NHS Trust                             |
| East Sussex Healthcare NHS Trust                                |
| Epsom and St Helier University Hospitals NHS Trust              |
| Frimley Park Hospital NHS Foundation Trust                      |
| Gateshead Health NHS Foundation Trust                           |
| George Eliot Hospital NHS Trust                                 |
| Gloucestershire Hospitals NHS Foundation Trust                  |
| Great Western Hospitals NHS Foundation Trust                    |
| Guy's and St Thomas' NHS Foundation Trust                       |
| Hampshire Hospitals NHS Foundation Trust                        |
| Harrogate and District NHS Foundation Trust                     |
| Heart of England NHS Foundation Trust                           |
| Heatherwood and Wexham Park Hospitals NHS Foundation Trust      |
| Hinchingbrooke Health Care NHS Trust                            |
| Homerton University Hospital NHS Foundation Trust               |
| Hull and East Yorkshire Hospitals NHS Trust                     |

|                                                                |
|----------------------------------------------------------------|
| Imperial College Healthcare NHS Trust                          |
| Ipswich Hospital NHS Trust                                     |
| Isle of Wight NHS PCT                                          |
| James Paget University Hospitals NHS Foundation Trust          |
| Kettering General Hospital NHS Foundation Trust                |
| King's College Hospital NHS Foundation Trust                   |
| Kingston Hospital NHS Trust                                    |
| Lancashire Teaching Hospitals NHS Foundation Trust             |
| Leeds Teaching Hospitals NHS Trust                             |
| Liverpool Heart and Chest NHS Foundation Trust                 |
| Liverpool Women's NHS Foundation Trust                         |
| Maidstone and Tunbridge Wells NHS Trust                        |
| Medway NHS Foundation Trust                                    |
| Mid Cheshire Hospitals NHS Foundation Trust                    |
| Mid Essex Hospital Services NHS Trust                          |
| Mid Staffordshire NHS Foundation Trust                         |
| Milton Keynes Hospital NHS Foundation Trust                    |
| Newham University Hospital NHS Trust                           |
| Norfolk and Norwich University Hospitals NHS Foundation Trust  |
| North Bristol NHS Trust                                        |
| North Cumbria University Hospitals NHS Trust                   |
| North Middlesex University Hospital NHS Trust                  |
| North Tees and Hartlepool NHS Foundation Trust                 |
| North West London Hospitals NHS Trust                          |
| Northampton General Hospital NHS Trust                         |
| Northern Devon Healthcare NHS Trust                            |
| Northern Lincolnshire and Goole Hospitals NHS Foundation Trust |
| Northumbria Healthcare NHS Foundation Trust                    |
| Nottingham University Hospitals NHS Trust                      |
| Nuffield Orthopaedic Centre NHS Trust                          |
| Oxford University Hospitals NHS Trust                          |
| Papworth Hospital NHS Foundation Trust                         |
| Pennine Acute Hospitals NHS Trust                              |
| Peterborough and Stamford Hospitals NHS Foundation Trust       |
| Plymouth Hospitals NHS Trust                                   |
| Portsmouth Hospitals NHS Trust                                 |
| Queen Victoria Hospital NHS Foundation Trust                   |
| Royal Berkshire NHS Foundation Trust                           |
| Royal Brompton and Harefield NHS Foundation Trust              |
| Royal Cornwall Hospitals NHS Trust                             |
| Royal Devon and Exeter NHS Foundation Trust                    |
| Royal Free London NHS Foundation Trust                         |
| Royal Liverpool and Broadgreen University Hospitals NHS Trust  |
| Royal National Orthopaedic Hospital NHS Trust                  |
| Royal Surrey County Hospital NHS Foundation Trust              |
| Royal United Hospital Bath NHS Trust                           |
| Salford Royal NHS Foundation Trust                             |

|                                                                           |
|---------------------------------------------------------------------------|
| Salisbury NHS Foundation Trust                                            |
| Sandwell and West Birmingham Hospitals NHS Trust                          |
| Scarborough and North East Yorkshire Health Care NHS Trust                |
| Sheffield Teaching Hospitals NHS Foundation Trust                         |
| Sherwood Forest Hospitals NHS Foundation Trust                            |
| Shrewsbury and Telford Hospital NHS Trust                                 |
| South Devon Healthcare NHS Foundation Trust                               |
| South London Healthcare NHS Trust                                         |
| South Tees Hospitals NHS Foundation Trust                                 |
| South Tyneside NHS Foundation Trust                                       |
| South Warwickshire NHS Foundation Trust                                   |
| Southend University Hospital NHS Foundation Trust                         |
| Southport and Ormskirk Hospital NHS Trust                                 |
| Spire Healthcare                                                          |
| St George's Healthcare NHS Trust                                          |
| St Helens and Knowsley Hospitals NHS Trust                                |
| Stockport NHS Foundation Trust                                            |
| Surrey and Sussex Healthcare NHS Trust                                    |
| Tameside Hospital NHS Foundation Trust                                    |
| Taunton and Somerset NHS Foundation Trust                                 |
| Tees, Esk and Wear Valleys NHS Foundation Trust                           |
| The Christie NHS Foundation Trust                                         |
| The Dudley Group NHS Foundation Trust                                     |
| The Hillingdon Hospitals NHS Foundation Trust                             |
| The Newcastle Upon Tyne Hospitals NHS Foundation Trust                    |
| The Princess Alexandra Hospital NHS Trust                                 |
| The Robert Jones and Agnes Hunt Orthopaedic Hospital NHS Foundation Trust |
| The Rotherham NHS Foundation Trust                                        |
| The Royal Bournemouth and Christchurch Hospitals NHS Foundation Trust     |
| The Royal Marsden NHS Foundation Trust                                    |
| The Royal Orthopaedic Hospital NHS Foundation Trust                       |
| The Royal Wolverhampton NHS Trust                                         |
| The Whittington Hospital NHS Trust                                        |
| Trafford Healthcare NHS Trust                                             |
| Tyneside Surgical Services Ltd                                            |
| United Lincolnshire Hospitals NHS Trust                                   |
| University College London Hospitals NHS Foundation Trust                  |
| University Hospital of North Staffordshire NHS Trust                      |
| University Hospital of South Manchester NHS Foundation Trust              |
| University Hospital Southampton NHS Foundation Trust                      |
| University Hospitals Birmingham NHS Foundation Trust                      |
| University Hospitals Bristol NHS Foundation Trust                         |
| University Hospitals Coventry and Warwickshire NHS Trust                  |
| University Hospitals of Leicester NHS Trust                               |
| University Hospitals of Morecambe Bay NHS Foundation Trust                |
| Walsall Healthcare NHS Trust                                              |

|                                                          |
|----------------------------------------------------------|
| Warrington and Halton Hospitals NHS Foundation Trust     |
| West Hertfordshire Hospitals NHS Trust                   |
| West Middlesex University Hospital NHS Trust             |
| West Suffolk NHS Foundation Trust                        |
| Western Sussex Hospitals NHS Trust                       |
| Whipps Cross University Hospital NHS Trust               |
| Winchester and Eastleigh Healthcare NHS Trust            |
| Wirral University Teaching Hospital NHS Foundation Trust |
| Worcestershire Acute Hospitals NHS Trust                 |
| Wrightington, Wigan and Leigh NHS Foundation Trust       |
| Wye Valley NHS Trust                                     |
| Yeovil District Hospital NHS Foundation Trust            |
| York Teaching Hospital NHS Foundation Trust              |
